# Supplementary material for: Isoform-selective induction of human p110δ PI3K expression by TNFα: identification of a new and inducible PIK3CD promoter
Source: PubMed Central journal article supplement — Biochem J. 2012 Apr 16;443(Pt 3):857–67. doi: 10.1042/BJ20112214 (PMC3328000; doi:10.1042/bj20112214), 2012-04-16
Supplement: bj4430857add.pdf [file bj4430857add.pdf]

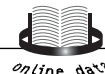

SUPPLEMENTARY ONLINE DATA

Isoform-selective induction of human p110δ PI3K expression by TNFα: identification of a new and inducible *PIK3CD* promoter

Maria A. WHITEHEAD\*, Michele BOMBARDIERI†, Costantino PITZALIS† and Bart VANHAESEBROECK\*<sup>1,2</sup>

\*Centre for Cell Signalling, Barts Cancer Institute, Queen Mary University of London, Charterhouse Square, London EC1M 6BQ, U.K., and †Centre for Experimental Medicine and Rheumatology, William Harvey Research Institute, Queen Mary University of London, Charterhouse Square, London EC1M 6BQ, U.K.

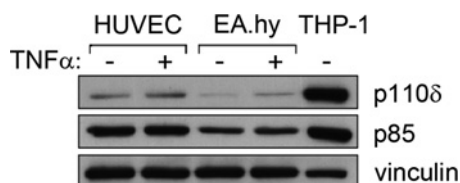

Figure S1 Comparison of p110δ expression levels in TNFα-stimulated ECs and unstimulated THP-1 cells

p110δ protein expression in unstimulated and TNFα-stimulated (10 ng/ml for 18 h) HUVECs and EA.hy926 cells compared with basal expression levels in THP-1 cells. Equal amounts (60 μg) of total cell lysate from each sample were analysed by Western blotting for the indicated proteins.

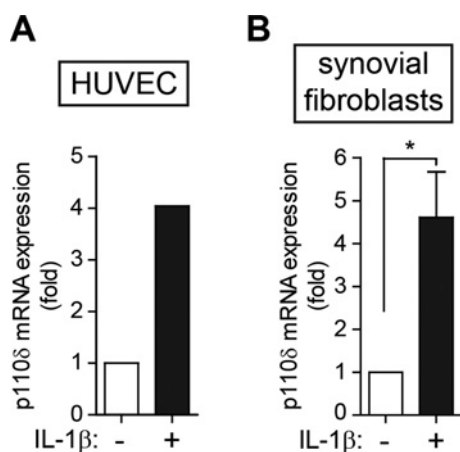

Figure S2 IL-1β stimulates *PIK3CD* mRNA expression in HUVECs and synovial fibroblasts

*PIK3CD* mRNA expression was analysed by qPCR in HUVECs that were stimulated with 20 ng/ml IL-1β for 12 h (A) and synovial fibroblasts with 10 ng/ml IL-1β for 18 h (B). *PIK3CD* transcript expression was normalized to 18S rRNA and shown as fold increase over unstimulated levels. Results are means for two experiments for HUVECs and the means ± S.E.M. for four independent experiments for synovial fibroblasts. \*P < 0.05 by two-tailed unpaired Student's *t* test.

<sup>1</sup> Bart Vanhaesebroeck is a consultant to GlaxoSmithKline (Stevenage, U.K.) and is a founder of and consultant to Activimics (London, U.K.).  
<sup>2</sup> To whom correspondence should be addressed (email bart.vanh@qmul.ac.uk).

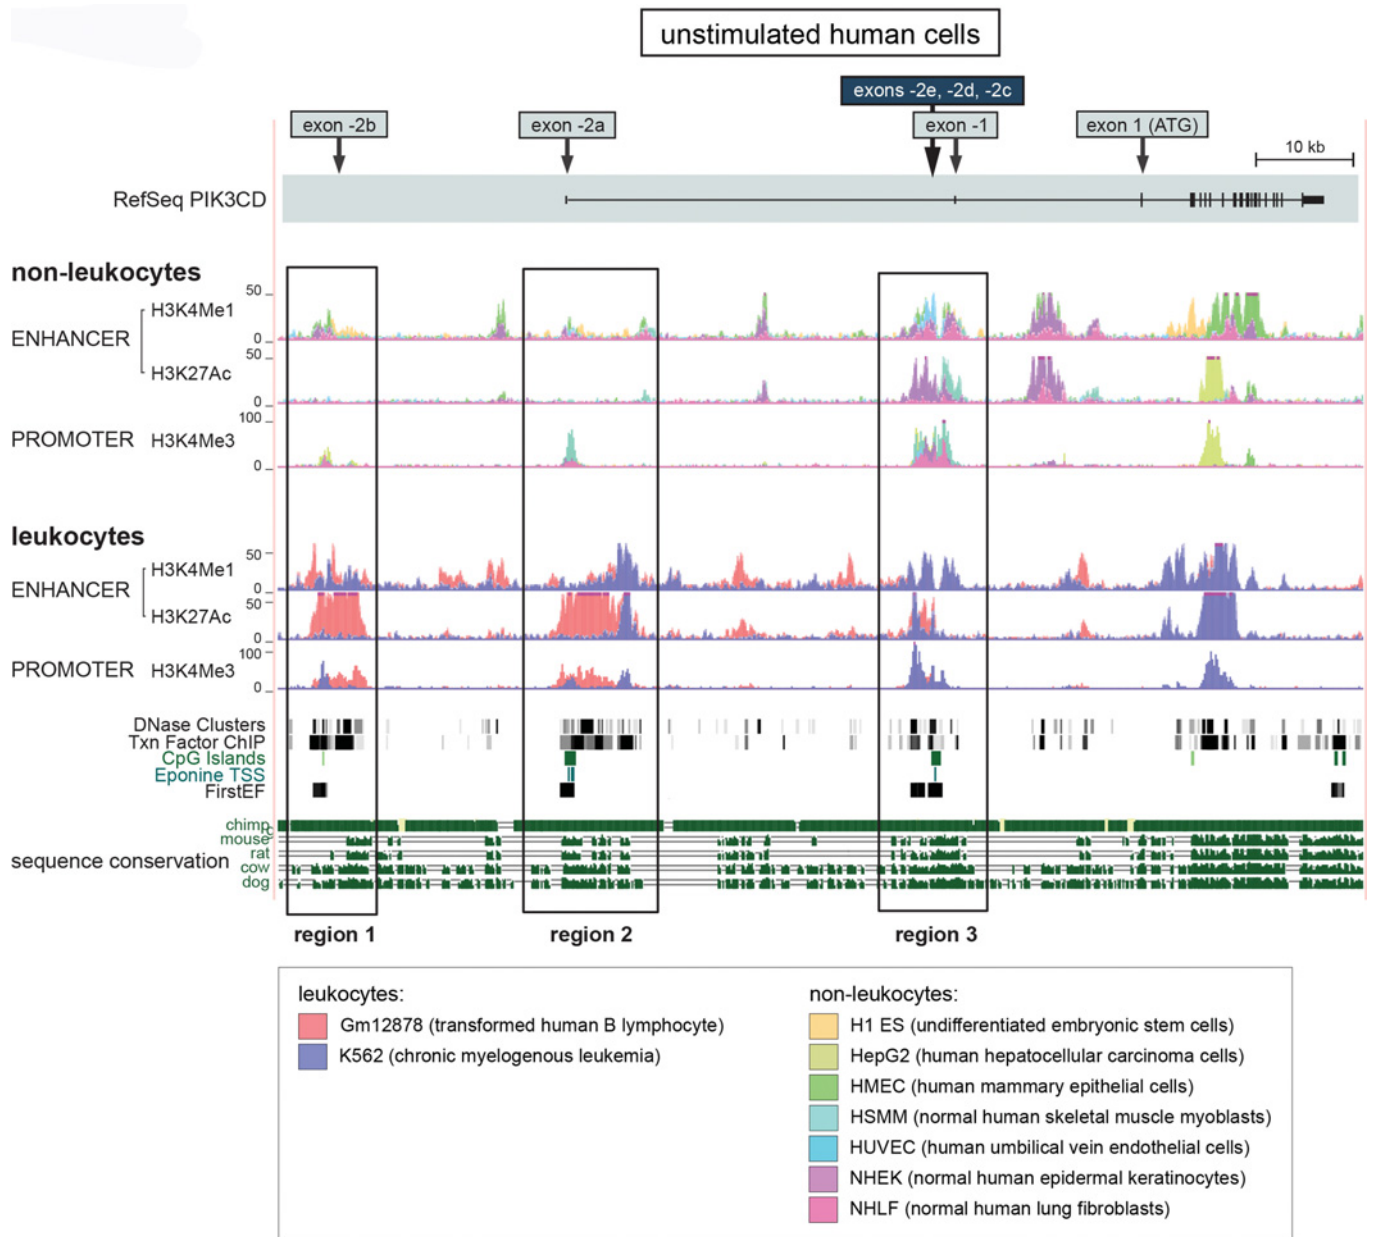

**Figure S3 Three human *PIK3CD* promoter regions revealed by bioinformatic analysis of functional regulatory elements**

The human *PIK3CD* locus in the UCSC genome browser as described in the legend to Figure 4 of the main text including ChIP-seq data for enhancer-associated H3K4Me1 and H3K27Ac shown separately for non-leucocytes and leucocytes.

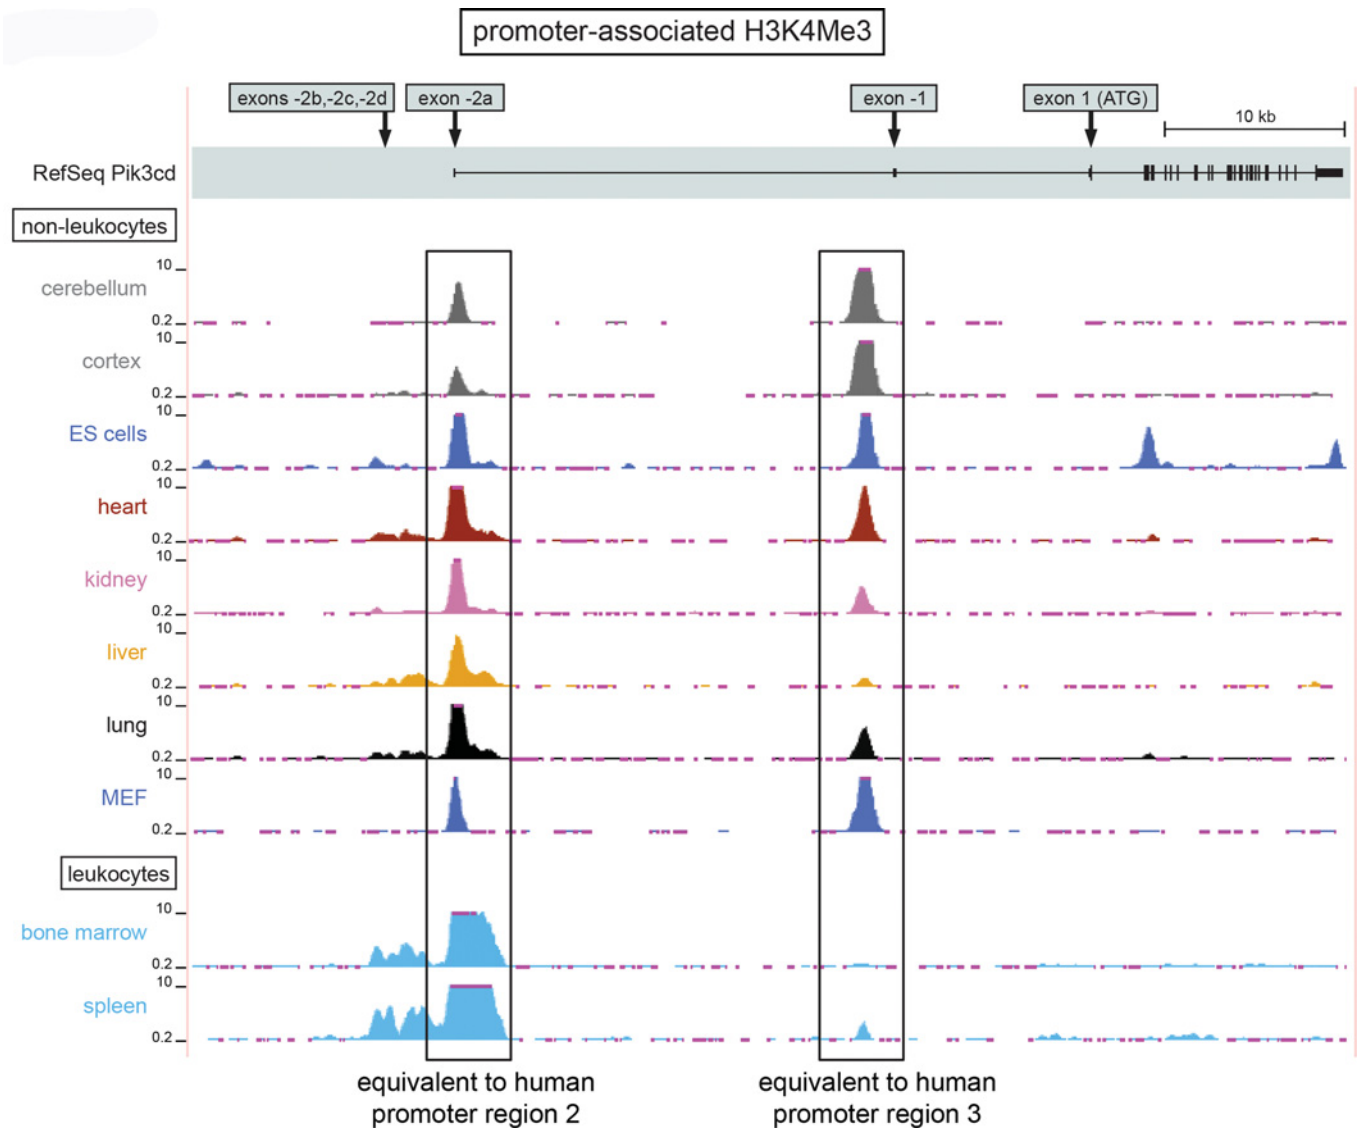

**Figure S4 Bioinformatics analysis of the mouse *Pik3cd* locus**

ChIP-seq data for the enrichment of H3K4Me3 in the mouse *Pik3cd* locus in the UCSC genome browser. The RefSeq *Pik3cd* mRNA transcript (on top) contains the untranslated exons -2a and -1 and all the protein-coding exons. The approximate locations of the untranslated exons -2c, -2d and -2e are indicated with arrows. The boxed regions surrounding exons -2a and -1 correspond to the human *PIK3CD* promoter regions 2 and 3 respectively (Figure 4 of the main text). Data collected from the indicated tissue and cell types are shown as separate tracks.

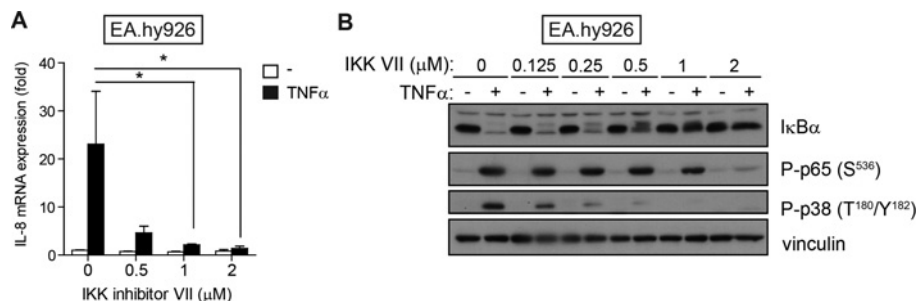

**Figure S5 IKK inhibitor VII prevents TNF $\alpha$ -stimulated NF- $\kappa$ B activation and IL-8 expression in EA.hy926 cells**

(A) EA.hy926 cells were pre-treated for 1 h with the indicated concentrations of IKK inhibitor VII or DMSO and stimulated with TNF $\alpha$  (10 ng/ml) for 6 h. Expression of *IL8* mRNA was analysed by qPCR and normalized to 18S rRNA. Results are expressed as fold increase over unstimulated DMSO-treated cells as means  $\pm$  S.E.M. for three independent experiments. \* $P$  < 0.05 by two-tailed unpaired Student's *t* test. (B) EA.hy926 cells were pre-treated for 1 h with the indicated concentrations of IKK inhibitor VII or DMSO and stimulated for 10 min with 10 ng/ml TNF $\alpha$ . Levels of the indicated proteins were analysed by Western blot.

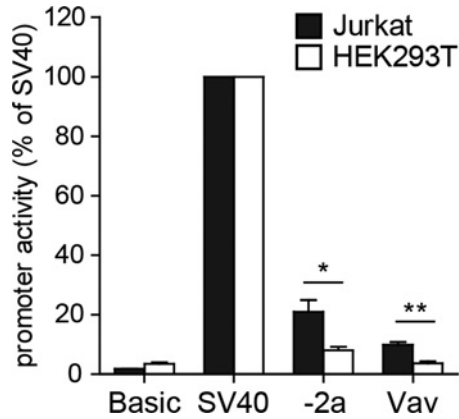

**Figure S6** Human *PIK3CD* exon -2a promoter has higher activity in leucocytes than non-leucocytes

Promoter activity of the genomic DNA containing human *PIK3CD* exon -2a and its immediate upstream sequence (-139 to +92 relative to the start sites of exon -2a) was analysed in a leucocyte (Jurkat) and a non-leucocyte [HEK (human embryonic kidney)-293T] cell line. The leucocyte-specific *Vav* promoter was used as positive control. Promoter activity is expressed as a percentage of that of the SV40 promoter (set as 100%) in each cell type. Results are means  $\pm$  S.E.M. for three independent experiments. \* $P < 0.05$ , \*\* $P < 0.01$  by two-tailed unpaired Student's *t* test.

**Table S1** Primer details

Sequence details of all the PCR primers and TaqMan qPCR assays used in the present study. The left-hand column indicates the experiment in which a given primer was used. FAM, 6-carboxyfluorescein.

| Experiment                                        | Primer name        | Primer sequence (5' → 3')                       |
|---------------------------------------------------|--------------------|-------------------------------------------------|
| PIK3CD-specific primers for 5'RACE                | OP2 (outer primer) | TCGCTGCCCTCAAACCTAACGTT                         |
|                                                   | IP2 (inner primer) | AATGGTACCAGGAGTCAAACCTCGTGGAGGCCT               |
| Cloning pGL3-exon-2a reporter                     | pGL3-exon-2a for   | GACTCTCGAGGCCCTGGAGGACCTGTTGTT                  |
|                                                   | pGL3-exon-2a rev   | GACTAGATCTGAGTGAGCCTCGAGGGAGGG                  |
| Cloning pGL3-exon-2e reporter                     | R1-F6 for          | ATTAACGCGTGGGGAATGGGGTGGAGGAAC                  |
|                                                   | R1-R2 rev          | ATTAAGATCTGAAGTCACACAGACATTCACTCAA              |
| $\kappa$ B site mutation in pGL3-exon-2e reporter | R1_M1_for          | TGGCTGATTTCTCATCTTGGTTCAAGGAGCGCCCTGGGGGGTCCGGT |
|                                                   | R1_M1_rev          | ACCGGACCCCCAGGGCGCTCCTTGAACCAAGATGAGAAATCAGCCA  |
| PIK3CD exon -1/1 TaqMan assay                     | Forward primer     | ACTCATTGATTCTAAAGCATCTT                         |
|                                                   | Reverse primer     | GCATCCTGCGTTGTTACTTC                            |
|                                                   | Probe (FAM)        | ACTATTCCAGAGAGGACAACCTGTCATCT                   |
| PIK3CD exon -2a/1 TaqMan assay                    | Forward primer     | CGAGCAGAGCCGCCA                                 |
|                                                   | Reverse primer     | AAGATGCTTTAGAATCAATGAGT                         |
|                                                   | Probe (FAM)        | AGCTGCGCCGGACATAAGGAGT                          |
| PIK3CD exon -2c/1 TaqMan assay                    | Forward primer     | CCCCTGGGCAACTGTCT                               |
|                                                   | Reverse primer     | CCGCCCTGGCCTGA                                  |
|                                                   | Probe (FAM)        | CTCCTTATCGGGTGTGCGCT                            |
| PIK3CD exon -2d/1 TaqMan assay                    | Forward primer     | CGCACCCGCTTCCT                                  |
|                                                   | Reverse primer     | TGCTTTAGAATCAATGAGTGTGTCATCCC                   |
|                                                   | Probe (FAM)        | CCTGACTCCTTATCTTTGC                             |
| PIK3CD exon -2e/1 TaqMan assay                    | Forward primer     | CCCGGATCTGTGAAAGCA                              |
|                                                   | Reverse primer     | CGCCCTGGCCTGACT                                 |
|                                                   | Probe (FAM)        | CCTTATCGGCCCGCACCC                              |

**Table S2 Different cell types analysed for p110 $\delta$  expression upon TNF $\alpha$  stimulation**Listed are all the different human and mouse cell types that were analysed for the expression of p110 $\delta$  upon stimulation with TNF $\alpha$ .

| Cell name  | Cell type                                        | Effect of TNF $\alpha$ on p110 $\delta$ expression |
|------------|--------------------------------------------------|----------------------------------------------------|
| THP-1      | Human acute monocytic leukaemia cell line        | 2-Fold increase (mRNA), no effect (protein)        |
| Jurkat     | Human immortalized T-cell line                   | No effect (protein)                                |
| RAW264.7   | Mouse macrophage-like cell line                  | No effect (protein)                                |
| 4T1        | Mouse mammary tumour cell line                   | No effect (protein)                                |
| MDA-MB-468 | Human breast cancer cell line                    | No effect (mRNA)                                   |
| MDA-MB-231 | Human breast cancer cell line                    | No effect (protein)                                |
| MCF-7      | Human breast cancer cell line                    | 2-Fold increase (mRNA, protein)                    |
| HeLa       | Human cervical cancer cell line                  | No effect (protein)                                |
| HEK-293T   | Human embryonic kidney cell line                 | No effect (mRNA, protein)                          |
| BMM        | Mouse primary bone marrow macrophage             | No effect (mRNA, protein)                          |
| pCEC       | Mouse primary cardiac endothelial cells          | No effect (protein)                                |
| iCEC       | Mouse immortalized cardiac endothelial cell line | No effect (mRNA, protein)                          |
| Lung EC    | Mouse primary lung endothelial cells             | No effect (mRNA, protein)                          |
| bEND5      | Mouse brain endothelial cell line                | No effect (mRNA, protein)                          |
| MEF        | Mouse primary embryonic fibroblasts              | 2-Fold increase (mRNA), no effect (protein)        |
| NIH-3T3    | Mouse fibroblast cell line                       | No effect (mRNA, protein)                          |

Received 22 December 2011/29 February 2012; accepted 29 February 2012

Published as BJ Immediate Publication 29 February 2012, doi:10.1042/BJ20112214
